# Supplementary material
Source: Research Square preprint supplement (doi:10.21203/rs.3.rs-9449488/v1)
Supplement: Supplementary file 1 [file 0773c8e8b41fea302b539c7f.docx]

**Table S1. Sociodemographic, socioeconomic, and clinical characteristics of cancer patients, and levels of anxiety and depression according to these characteristics, multicentre study, Bamako, Mali, 2024-2025.**

| **Characteristic** | **Level of anxiety** | | | | | **Level of depression** | | | | |
| --- | --- | --- | --- | --- | --- | --- | --- | --- | --- | --- |
| **Overall N = 330** | **No anxiety N = 92** | **Mild anxiety N = 87** | **Moderate anxiety N = 127** | **Severe anxiety N = 24** | **Overall N = 330** | **No depression N = 107** | **Mild depression N = 69** | **Moderate depression N = 87** | **Severe depression N = 67** |
| ***Sociodemographic characteristics*** |  |  |  |  |  |  |  |  |  |  |
| **Age group** |  |  |  |  |  |  |  |  |  |  |
| 24 years or less | 11 (3.3%) | 4 (4.3%) | 1 (1.1%) | 5 (3.9%) | 1 (4.2%) | 11 (3.3%) | 5 (4.7%) | 2 (2.9%) | 1 (1.1%) | 3 (4.5%) |
| 25 to 49 years | 154 (46.7%) | 33 (35.9%) | 38 (43.7%) | 66 (52.0%) | 17 (70.8%) | 154 (46.7%) | 54 (50.5%) | 27 (39.1%) | 33 (37.9%) | 40 (59.7%) |
| 50 years or more | 165 (50.0%) | 55 (59.8%) | 48 (55.2%) | 56 (44.1%) | 6 (25.0%) | 165 (50.0%) | 48 (44.9%) | 40 (58.0%) | 53 (60.9%) | 24 (35.8%) |
| **Sex** |  |  |  |  |  |  |  |  |  |  |
| Male | 95 (28.8%) | 34 (37.0%) | 30 (34.5%) | 26 (20.5%) | 5 (20.8%) | 95 (28.8%) | 31 (29.0%) | 21 (30.4%) | 24 (27.6%) | 19 (28.4%) |
| Female | 235 (71.2%) | 58 (63.0%) | 57 (65.5%) | 101 (79.5%) | 19 (79.2%) | 235 (71.2%) | 76 (71.0%) | 48 (69.6%) | 63 (72.4%) | 48 (71.6%) |
| **Marital status** |  |  |  |  |  |  |  |  |  |  |
| No longer in union | 78 (23.6%) | 17 (18.5%) | 24 (27.6%) | 34 (26.8%) | 3 (12.5%) | 78 (23.6%) | 25 (23.4%) | 17 (24.6%) | 21 (24.1%) | 15 (22.4%) |
| In union | 252 (76.4%) | 75 (81.5%) | 63 (72.4%) | 93 (73.2%) | 21 (87.5%) | 252 (76.4%) | 82 (76.6%) | 52 (75.4%) | 66 (75.9%) | 52 (77.6%) |
| **Level of instruction** |  |  |  |  |  |  |  |  |  |  |
| No formal education | 142 (43.0%) | 32 (34.8%) | 38 (43.7%) | 62 (48.8%) | 10 (41.7%) | 142 (43.0%) | 29 (27.1%) | 34 (49.3%) | 48 (55.2%) | 31 (46.3%) |
| Primary education | 87 (26.4%) | 28 (30.4%) | 25 (28.7%) | 28 (22.0%) | 6 (25.0%) | 87 (26.4%) | 30 (28.0%) | 21 (30.4%) | 21 (24.1%) | 15 (22.4%) |
| Secondary or higher education | 101 (30.6%) | 32 (34.8%) | 24 (27.6%) | 37 (29.1%) | 8 (33.3%) | 101 (30.6%) | 48 (44.9%) | 14 (20.3%) | 18 (20.7%) | 21 (31.3%) |
| **Residence** |  |  |  |  |  |  |  |  |  |  |
| Bamako | 144 (43.6%) | 51 (55.4%) | 36 (41.4%) | 46 (36.2%) | 11 (45.8%) | 144 (43.6%) | 50 (46.7%) | 31 (44.9%) | 35 (40.2%) | 28 (41.8%) |
| Outside Bamako | 186 (56.4%) | 41 (44.6%) | 51 (58.6%) | 81 (63.8%) | 13 (54.2%) | 186 (56.4%) | 57 (53.3%) | 38 (55.1%) | 52 (59.8%) | 39 (58.2%) |
| **Living arrangement** |  |  |  |  |  |  |  |  |  |  |
| Alone | 13 (3.9%) | 4 (4.3%) | 1 (1.1%) | 8 (6.3%) | 0 (0.0%) | 13 (3.9%) | 2 (1.9%) | 1 (1.4%) | 6 (6.9%) | 4 (6.0%) |
| In family | 317 (96.1%) | 88 (95.7%) | 86 (98.9%) | 119 (93.7%) | 24 (100.0%) | 317 (96.1%) | 105 (98.1%) | 68 (98.6%) | 81 (93.1%) | 63 (94.0%) |
| ***Socioeconomic characteristics*** |  |  |  |  |  |  |  |  |  |  |
| **Professional status** |  |  |  |  |  |  |  |  |  |  |
| Employee/retiree | 64 (19.4%) | 26 (28.3%) | 14 (16.1%) | 20 (15.7%) | 4 (16.7%) | 64 (19.4%) | 32 (29.9%) | 12 (17.4%) | 12 (13.8%) | 8 (11.9%) |
| Unemployed | 184 (55.8%) | 48 (52.2%) | 55 (63.2%) | 71 (55.9%) | 10 (41.7%) | 184 (55.8%) | 45 (42.1%) | 42 (60.9%) | 52 (59.8%) | 45 (67.2%) |
| Informal employment | 82 (24.8%) | 18 (19.6%) | 18 (20.7%) | 36 (28.3%) | 10 (41.7%) | 82 (24.8%) | 30 (28.0%) | 15 (21.7%) | 23 (26.4%) | 14 (20.9%) |
| **Do you have financial difficulties in paying for medical prescriptions (Yes)** | 148 (44.8%) | 34 (37.0%) | 40 (46.0%) | 63 (49.6%) | 11 (45.8%) | 148 (44.8%) | 36 (33.6%) | 34 (49.3%) | 39 (44.8%) | 39 (58.2%) |
| **Are you satisfied with the social support you receive from those around you?** |  |  |  |  |  |  |  |  |  |  |
| Satisfied | 203 (61.5%) | 58 (63.0%) | 54 (62.1%) | 80 (63.0%) | 11 (45.8%) | 203 (61.5%) | 72 (67.3%) | 50 (72.5%) | 48 (55.2%) | 33 (49.3%) |
| Not satisfied | 127 (38.5%) | 34 (37.0%) | 33 (37.9%) | 47 (37.0%) | 13 (54.2%) | 127 (38.5%) | 35 (32.7%) | 19 (27.5%) | 39 (44.8%) | 34 (50.7%) |
| **How do you perceive the social support you receive from those around you?** |  |  |  |  |  |  |  |  |  |  |
| High | 143 (43.3%) | 42 (45.7%) | 38 (43.7%) | 55 (43.3%) | 8 (33.3%) | 143 (43.3%) | 53 (49.5%) | 29 (42.0%) | 37 (42.5%) | 24 (35.8%) |
| Low | 187 (56.7%) | 50 (54.3%) | 49 (56.3%) | 72 (56.7%) | 16 (66.7%) | 187 (56.7%) | 54 (50.5%) | 40 (58.0%) | 50 (57.5%) | 43 (64.2%) |
| ***Clinical features*** |  |  |  |  |  |  |  |  |  |  |
| **Cancer site** |  |  |  |  |  |  |  |  |  |  |
| Digestive | 91 (27.6%) | 27 (29.3%) | 26 (29.9%) | 33 (26.0%) | 5 (20.8%) | 91 (27.6%) | 25 (23.4%) | 19 (27.5%) | 26 (29.9%) | 21 (31.3%) |
| Breast | 89 (27.0%) | 21 (22.8%) | 20 (23.0%) | 36 (28.3%) | 12 (50.0%) | 89 (27.0%) | 32 (29.9%) | 14 (20.3%) | 24 (27.6%) | 19 (28.4%) |
| Gynaecological | 84 (25.5%) | 24 (26.1%) | 23 (26.4%) | 32 (25.2%) | 5 (20.8%) | 84 (25.5%) | 27 (25.2%) | 20 (29.0%) | 24 (27.6%) | 13 (19.4%) |
| Male genital | 17 (5.2%) | 3 (3.3%) | 7 (8.0%) | 5 (3.9%) | 2 (8.3%) | 17 (5.2%) | 4 (3.7%) | 4 (5.8%) | 4 (4.6%) | 5 (7.5%) |
| Respiratory | 12 (3.6%) | 4 (4.3%) | 3 (3.4%) | 5 (3.9%) | 0 (0.0%) | 12 (3.6%) | 5 (4.7%) | 0 (0.0%) | 4 (4.6%) | 3 (4.5%) |
| Other | 37 (11.2%) | 13 (14.1%) | 8 (9.2%) | 16 (12.6%) | 0 (0.0%) | 37 (11.2%) | 14 (13.1%) | 12 (17.4%) | 5 (5.7%) | 6 (9.0%) |
| **Stage of cancer progression** |  |  |  |  |  |  |  |  |  |  |
| Localized cancer | 101 (30.6%) | 30 (32.6%) | 26 (29.9%) | 38 (29.9%) | 7 (29.2%) | 101 (30.6%) | 42 (39.3%) | 20 (29.0%) | 23 (26.4%) | 16 (23.9%) |
| Advanced cancer | 127 (38.5%) | 35 (38.0%) | 35 (40.2%) | 48 (37.8%) | 9 (37.5%) | 127 (38.5%) | 41 (38.3%) | 23 (33.3%) | 34 (39.1%) | 29 (43.3%) |
| Metastatic cancer | 102 (30.9%) | 27 (29.3%) | 26 (29.9%) | 41 (32.3%) | 8 (33.3%) | 102 (30.9%) | 24 (22.4%) | 26 (37.7%) | 30 (34.5%) | 22 (32.8%) |
| **Were you informed of your cancer diagnosis?(Yes)** | 246 (74.5%) | 68 (73.9%) | 62 (71.3%) | 96 (75.6%) | 20 (83.3%) | 246 (74.5%) | 82 (76.6%) | 50 (72.5%) | 64 (73.6%) | 50 (74.6%) |
| **How do you perceive your illness?** |  |  |  |  |  |  |  |  |  |  |
| High threat | 171(51.8%) | 38 (43.7%) | 81 (63.8%) | 30 (32.6%) | 22 (91.7%) | 171(51.8%) | 32 (46.4%) | 60 (69.0%) | 20 (18.7%) | 59 (88.1%) |
| Low threat | 86 (26.1%) | 23 (26.4%) | 11 (8.7%) | 51 (55.4%) | 1 (4.2%) | 86 (26.1%) | 19 (27.5%) | 8 (9.2%) | 58 (54.2%) | 1 (1.5%) |
| Moderate threat | 73 (22.1%) | 26 (29.9%) | 35 (27.6%) | 11 (12.0%) | 1 (4.2%) | 73 (22.1%) | 18 (26.1%) | 19 (21.8%) | 29 (27.1%) | 7 (10.4% |
| **Have you received chemotherapy? (Yes)** | 230 (69.7%) | 69 (75.0%) | 61 (70.1%) | 85 (66.9%) | 15 (62.5%) | 230 (69.7%) | 84 (78.5%) | 48 (69.6%) | 55 (63.2%) | 43 (64.2%) |
| **Did you have surgery? (Yes)** | 169 (51.2%) | 52 (56.5%) | 43 (49.4%) | 60 (47.2%) | 14 (58.3%) | 169 (51.2%) | 62 (57.9%) | 37 (53.6%) | 36 (41.4%) | 34 (50.7%) |
| **Did you have radiotherapy? (Yes)** | 7 (2.1%) | 4 (4.3%) | 2 (2.3%) | 0 (0.0%) | 1 (4.2%) | 7 (2.1%) | 4 (3.7%) | 2 (2.9%) | 0 (0.0%) | 1 (1.5%) |
| **Purpose of treatment** |  |  |  |  |  |  |  |  |  |  |
| Curative | 204 (61.8%) | 60 (65.2%) | 60 (69.0%) | 69 (54.3%) | 15 (62.5%) | 204 (61.8%) | 84 (78.5%) | 36 (52.2%) | 46 (52.9%) | 38 (56.7%) |
| Palliative | 126 (38.2%) | 32 (34.8%) | 27 (31.0%) | 58 (45.7%) | 9 (37.5%) | 126 (38.2%) | 23 (21.5%) | 33 (47.8%) | 41 (47.1%) | 29 (43.3%) |
| **Post–operative complications(Yes)** | 11 (3.3%) | 3 (3.3%) | 2 (2.3%) | 5 (3.9%) | 1 (4.2%) | 11 (3.3%) | 1 (0.9%) | 1 (1.4%) | 3 (3.4%) | 6 (9.0%) |
